# Supplementary material for: Relevance of Molecular Profiling in Patients With Low-Grade Endometrial Cancer
Source: PubMed Central journal article supplement (PMC9856566; doi:10.1001/jamanetworkopen.2022.47372), 2022-12-16
Supplement: jamanetwopen-e2247372-s002.pdf [file jamanetwopen-e2247372-s002.pdf]

## Data Sharing Statement

Vrede. Relevance of Molecular Profiling in Patients With Low-Grade Endometrial Cancer.  
*JAMA Netw Open*. Published December 16, 2022. doi:10.1001/jamanetworkopen.2022.47372

### Data

**Data available:** Yes

**Data types:** Deidentified participant data

**How to access data:** Data on request, contact: [stephanie.vrede@radboudumc.nl](mailto:stephanie.vrede@radboudumc.nl)

**When available:** With publication

### Supporting Documents

**Document types:** None

### Additional Information

**Who can access the data:** Researchers requesting the data

**Types of analyses:** Any purpose

**Mechanisms of data availability:** Signed data access agreement
